# Supplementary material for: Physical and mental effects of different radical prostatectomy techniques on urologic surgeons
Source: PeerJ journal article supplement (doi:10.7717/peerj.19908), 2025-08-20
Supplement: RAW_DATA_TOTAL.zip [file RAW_DATA_TOTAL.zip]

## Sheet: Question 1
ERGONOMIC EVALUATION OF RADICAL PROSTATECTOMY TECHNIQUES
Which of following complaints do you experience during or after performing radical prostatectomy with the preferred technique(s)? (Please specify the severity of your complaints between ''1 and 10''. If you do not experience any complaint, skip this question. Please check all that apply)
	0		1-10		11-20		21-30		31-40		41-50		51-60		61-70		71-80		81-90		91-100		101-110		111-120		121-130		131-140		141-150		151-160		161-170		171-180		181-190		191-200		201-250		251-300		>300		Total
Open	0.0606	6	0.4343	43	0.3232	32	0.1515	15	0.0101	1	0	0	0	0	0	0	0.0101	1	0	0	0.0101	1	0	0	0	0	0	0	0	0	0	0	0	0	0	0	0	0	0	0	0	0	0	0	0	0	0	0	99
Laparoscopic	0.463	25	0.2963	16	0.0926	5	0.0185	1	0	0	0.0741	4	0.0185	1	0.037	2	0	0	0	0	0	0	0	0	0	0	0	0	0	0	0	0	0	0	0	0	0	0	0	0	0	0	0	0	0	0	0	0	54
Robotic	0.4583	22	0.1042	5	0.0625	3	0.0417	2	0.0833	4	0.0417	2	0.0625	3	0.0208	1	0.0417	2	0.0208	1	0.0208	1	0.0208	1	0	0	0.0208	1	0	0	0	0	0	0	0	0	0	0	0	0	0	0	0	0	0	0	0	0	48
																																																Answered	107
																																																Skipped	0

## Sheet: Question 2
ERGONOMIC EVALUATION OF RADICAL PROSTATECTOMY TECHNIQUES
Before the radical prostatectomy, how often do expectations of your patient and/or his family (relatives) cause stress on you?
Answer Choices	Responses
Always	0.0935	10
Usually	0.3364	36
Sometimes	0.3364	36
Rarely	0.1682	18
Never	0.0654	7
	Answered	107
	Skipped	0

## Sheet: Question 3
ERGONOMIC EVALUATION OF RADICAL PROSTATECTOMY TECHNIQUES
How often do expectations of your employer about radical prostatectomy cause stress on you?
Answer Choices	Responses
Always	0.0187	2
Usually	0.0654	7
Sometimes	0.1963	21
Rarely	0.2523	27
Never	0.4673	50
	Answered	107
	Skipped	0

## Sheet: Question 4
ERGONOMIC EVALUATION OF RADICAL PROSTATECTOMY TECHNIQUES
During a radical prostatectomy, which of the following(s) cause(s) stress on you? (Please check all that apply)
Answer Choices	Responses
None	0.0187	2
His morbid obesity	0.729	78
Grade or stage of the disease	0.4112	44
Prior history of abdominal operation	0.6075	65
Frequent change of the surgical team	0.1589	17
Complications during or after the surgery	0.5421	58
Lack of standard postoperative care	0.1028	11
Postoperative follow-up	0.0935	10
Other (please specify)	0.0654	7
	Answered	107
	Skipped	0
Respondents	Response Date	other	Tags
1	Jul 20 2020 09:34 AM	other
2	Jun 21 2020 03:13 PM	other
3	Jun 13 2020 06:23 PM	other
4	Jun 11 2020 02:32 AM	other
5	Jun 09 2020 02:51 PM	other
6	Jun 07 2020 09:49 PM	other
7	Jun 03 2020 05:01 PM	other

## Sheet: Question 5
ERGONOMIC EVALUATION OF RADICAL PROSTATECTOMY TECHNIQUES
How much does/do the preferred technique(s) exhaust you physically? (Please check all that apply)
Skor (0 - 10 )
	0		1		2		3		4		5		6		7		8		9		10		Total
Open	0.0288	3	0.0673	7	0.0577	6	0.125	13	0.0865	9	0.2308	24	0.125	13	0.1635	17	0.0769	8	0.0192	2	0.0192	2	104
Laparoskopic	0.0652	3	0.0217	1	0	0	0.0435	2	0.0435	2	0.1739	8	0.1739	8	0.0652	3	0.1957	9	0.1522	7	0.0652	3	46
Robotic	0.1563	5	0.1875	6	0.25	8	0.1563	5	0.0938	3	0.125	4	0.0313	1	0	0	0	0	0	0	0	0	32
																						Answered	107
																						Skipped	0

## Sheet: Question 6
ERGONOMIC EVALUATION OF RADICAL PROSTATECTOMY TECHNIQUES
Which of following complaints do you experience during or after performing radical prostatectomy with the preferred technique(s)? (Please specify the severity of your complaints between ''1 and 10''. If you do not experience any complaint, skip this question. Please check all that apply)
Open
	1		2		3		4		5		6		7		8		9		10		Total
Forehead pain	0.2903	9	0.2258	7	0.2258	7	0.0968	3	0.0645	2	0	0	0.0323	1	0.0645	2	0	0	0	0	31
Eye strain	0.3333	10	0.1667	5	0.1	3	0.1667	5	0.1	3	0.0333	1	0.0333	1	0.0667	2	0	0	0	0	30
Neck pain	0.0851	4	0.0851	4	0.1489	7	0.1064	5	0.234	11	0.1064	5	0.1277	6	0.0638	3	0.0213	1	0.0213	1	47
Back pain	0.0508	3	0.1017	6	0.1864	11	0.1017	6	0.1186	7	0.1695	10	0.1695	10	0.0678	4	0	0	0.0339	2	59
Shoulder stiffness	0.1935	6	0.0645	2	0.1613	5	0.0645	2	0.2258	7	0.0968	3	0.0968	3	0.0323	1	0	0	0.0645	2	31
Chest pain	0.6	12	0.15	3	0.05	1	0.05	1	0.05	1	0.1	2	0	0	0	0	0	0	0	0	20
Arm pain	0.1667	6	0.0556	2	0.1667	6	0.0556	2	0.2222	8	0.0833	3	0.0833	3	0.1389	5	0	0	0.0278	1	36
Forearm pain	0.2143	6	0.0357	1	0.2143	6	0.1071	3	0.1071	3	0.0357	1	0.1071	3	0.1071	3	0.0357	1	0.0357	1	28
Elbow stiffness	0.5	9	0.2222	4	0	0	0	0	0.0556	1	0.1111	2	0.0556	1	0	0	0	0	0.0556	1	18
Hand pain	0.1316	5	0.1579	6	0.0789	3	0.1842	7	0.2632	10	0.0263	1	0.0526	2	0.0789	3	0	0	0.0263	1	38
Wrist stiffness	0.1538	4	0.1154	3	0.1923	5	0.0769	2	0.2308	6	0.1154	3	0.0385	1	0	0	0	0	0.0769	2	26
Finger numbness	0.3226	10	0.0968	3	0.0968	3	0.2581	8	0.0968	3	0	0	0.0645	2	0.0323	1	0	0	0.0323	1	31
Leg pain	0.093	4	0.0698	3	0.186	8	0.0233	1	0.186	8	0.0698	3	0.093	4	0.1628	7	0.0465	2	0.0698	3	43
Other ( please specify the preferred technique , your complaints and its severity between 1 and 10)																					1
																				Answered	95
																				Skipped	12
Lap
	1		2		3		4		5		6		7		8		9		10		Total
Forehead pain	0	0	0	0	0.1333	2	0.0667	1	0.3333	5	0.1333	2	0.1333	2	0.0667	1	0.1333	2	0	0	15
Eye strain	0.15	3	0.05	1	0.1	2	0.1	2	0.2	4	0.1	2	0.2	4	0.05	1	0	0	0.05	1	20
Neck pain	0.0417	1	0	0	0.125	3	0.0417	1	0.1667	4	0.25	6	0.125	3	0.0833	2	0.125	3	0.0417	1	24
Back pain	0.0345	1	0	0	0.1034	3	0.0345	1	0.3103	9	0.1034	3	0.1379	4	0.1034	3	0.069	2	0.1034	3	29
Shoulder stiffness	0	0	0.1333	2	0.0667	1	0	0	0.2	3	0.2	3	0.2	3	0.0667	1	0	0	0.1333	2	15
Chest pain	0.5556	5	0	0	0.1111	1	0.1111	1	0	0	0	0	0.1111	1	0.1111	1	0	0	0	0	9
Arm pain	0.05	1	0	0	0.1	2	0.05	1	0.1	2	0.15	3	0.2	4	0.15	3	0.05	1	0.15	3	20
Forearm pain	0.0667	1	0.0667	1	0	0	0.1333	2	0.2	3	0	0	0.1333	2	0.2	3	0.0667	1	0.1333	2	15
Elbow stiffness	0.0909	1	0.0909	1	0	0	0.0909	1	0.0909	1	0.2727	3	0.1818	2	0.0909	1	0.0909	1	0	0	11
Hand pain	0.0714	1	0	0	0.0714	1	0.2143	3	0.2143	3	0.1429	2	0.1429	2	0.0714	1	0	0	0.0714	1	14
Wrist stiffness	0.0667	1	0.2	3	0.0667	1	0.2	3	0.0667	1	0.0667	1	0.2	3	0.0667	1	0	0	0.0667	1	15
Finger numbness	0.0556	1	0.1111	2	0.0556	1	0.1111	2	0.1111	2	0.2222	4	0.1111	2	0	0	0.0556	1	0.1667	3	18
Leg pain	0.0385	1	0.0769	2	0.1154	3	0.0385	1	0.2692	7	0.1154	3	0.1154	3	0.1154	3	0.0385	1	0.0769	2	26
Other ( please specify the preferred technique , your complaints and its severity between 1 and 10)																					1
																				Answered	95
																				Skipped	12
Robotic
	1		2		3		4		5		6		7		8		9		10		Total
Forehead pain	0.4	6	0.1333	2	0.1333	2	0	0	0.1333	2	0	0	0.0667	1	0.0667	1	0.0667	1	0	0	15
Eye strain	0.1579	3	0.0526	1	0.1579	3	0.1579	3	0.1053	2	0.1053	2	0.1579	3	0.0526	1	0.0526	1	0	0	19
Neck pain	0.25	5	0.1	2	0.05	1	0.05	1	0.25	5	0.1	2	0.1	2	0.05	1	0.05	1	0	0	20
Back pain	0.1429	2	0.2143	3	0.1429	2	0.2143	3	0.0714	1	0	0	0	0	0	0	0.2143	3	0	0	14
Shoulder stiffness	0.2727	3	0	0	0.3636	4	0.0909	1	0.0909	1	0	0	0.0909	1	0.0909	1	0	0	0	0	11
Chest pain	0.8889	8	0.1111	1	0	0	0	0	0	0	0	0	0	0	0	0	0	0	0	0	9
Arm pain	0.3636	4	0	0	0.2727	3	0.0909	1	0.0909	1	0	0	0.0909	1	0.0909	1	0	0	0	0	11
Forearm pain	0.4545	5	0.0909	1	0.1818	2	0	0	0	0	0.0909	1	0.0909	1	0.0909	1	0	0	0	0	11
Elbow stiffness	0.5556	5	0	0	0	0	0	0	0	0	0.1111	1	0.1111	1	0.1111	1	0.1111	1	0	0	9
Hand pain	0.0714	1	0.1429	2	0.1429	2	0.0714	1	0	0	0.1429	2	0.0714	1	0.2857	4	0.0714	1	0	0	14
Wrist stiffness	0.3333	4	0	0	0.1667	2	0.0833	1	0.0833	1	0.0833	1	0.1667	2	0.0833	1	0	0	0	0	12
Finger numbness	0.125	2	0.125	2	0.125	2	0.0625	1	0.0625	1	0.0625	1	0.1875	3	0.1875	3	0.0625	1	0	0	16
Leg pain	0.4667	7	0.1333	2	0.1333	2	0	0	0.0667	1	0	0	0.0667	1	0	0	0.0667	1	0.0667	1	15
Other ( please specify the preferred technique , your complaints and its severity between 1 and 10)																					1
																				Answered	95
																				Skipped	12
Respondents	Response Date	Other ( please specify the preferred technique , your complaints and its severity between 1 and 10)	Tags
1	Jul 21 2020 06:29 AM	other

## Sheet: Question 7
ERGONOMIC EVALUATION OF RADICAL PROSTATECTOMY TECHNIQUES
Have you received any professional support for the complaints that you have experienced? (If you do not experience any complaint, skip this question. Please check all that apply)
Answer Choices	Responses
No	0.7553	71
Life style modifications	0.1702	16
Physical therapy modalities ( Massage, TENS, dry needling, hot-cold compress, stretching..etc)	0.1064	10
Medical treatment(s)	0.0638	6
Surgery	0.0213	2
Other (please specify)	0.0319	3
	Answered	94
	Skipped	13
Respondents	Response Date	other	Tags
1	Jun 15 2020 09:00 PM	0
2	Jun 03 2020 03:51 PM	Sport
3	May 31 2020 04:34 PM	Medical supports

## Sheet: Question 8
ERGONOMIC EVALUATION OF RADICAL PROSTATECTOMY TECHNIQUES
Do/Does your complaint(s) affect your choice of radical prostatectomy technique? (If you do not experience any complaint, skip this question)
Answer Choices	Responses
Always	0.0208	2
Usually	0.1458	14
Sometimes	0.0938	9
Rarely	0.125	12
Never	0.3542	34
I am able to perform only one type of technique.	0.2604	25
	Answered	96
	Skipped	11

## Sheet: Question 9
ERGONOMIC EVALUATION OF RADICAL PROSTATECTOMY TECHNIQUES
Please only choose the exercise and/or physical activities which you regularly do (If none is regular, skip this question. Please check all that apply)
times/week
	1		2		3		4		5		6		7		Total
Walking	0.1233	9	0.2329	17	0.274	20	0.1096	8	0.1507	11	0	0	0.1096	8	73
Running	0.32	8	0.2	5	0.4	10	0.04	1	0.04	1	0	0	0	0	25
Bicycling	0.375	6	0.1875	3	0.125	2	0.1875	3	0.0625	1	0	0	0.0625	1	16
Swimming	0.6923	9	0.0769	1	0.0769	1	0	0	0.0769	1	0.0769	1	0	0	13
Football	1	4	0	0	0	0	0	0	0	0	0	0	0	0	4
Basketball	0.6667	4	0.1667	1	0	0	0.1667	1	0	0	0	0	0	0	6
Volleyball	0	0	0	0	0	0	0	0	0	0	0	0	0	0	0
Tennis	1	1	0	0	0	0	0	0	0	0	0	0	0	0	1
Golf	0	0	0	0	1	1	0	0	0	0	0	0	0	0	1
Weightlifting	0.1765	3	0.3529	6	0.2941	5	0.0588	1	0.0588	1	0	0	0.0588	1	17
Boxing	0	0	0.3333	1	0.6667	2	0	0	0	0	0	0	0	0	3
Meditation	0.6	3	0.2	1	0	0	0.2	1	0	0	0	0	0	0	5
Yoga	0	0	0.3333	1	0.3333	1	0.3333	1	0	0	0	0	0	0	3
Pilates	1	2	0	0	0	0	0	0	0	0	0	0	0	0	2
Other (please specify your sports activity or exercise type with its frequency within a week )															3
														Answered	84
														Skipped	23
Respondents	Response Date	Other (please specify your sports activity or exercise type with its frequency within a week )	Tags
1	Jun 15 2020 09:00 PM	0
2	Jun 06 2020 11:54 PM	other
3	Jun 06 2020 10:26 PM	other

## Sheet: Question 10
ERGONOMIC EVALUATION OF RADICAL PROSTATECTOMY TECHNIQUES
Please specify your age, gender, weight ,height and the country you live in.
Answer Choices	Responses
Age (year):	1	107
Gender :	1	107
Weight (kg) :	1	107
Height (cm) :	1	107
Country :	1	107
	Answered	107
	Skipped	0
Respondents	Response Date	Age ( year) :	Tags	Gender	Tags	Weight (kg)	Tags	Height (cm) :	Tags	Country :	Tags
1	Jul 21 2020 02:06 PM	56		male		87		187		Turkey
2	Jul 21 2020 06:29 AM	55		male		84		1.82		Türkiye
3	Jul 20 2020 10:03 PM	49		male		97		178		Türkiye
4	Jul 20 2020 04:41 PM	64		male		80		172		Türkiye
5	Jul 20 2020 09:34 AM	59		male		71		172		TR
6	Jul 20 2020 09:15 AM	49		male		86		174		Türkiye
7	Jul 20 2020 08:40 AM	51		male		90		178		türkiye
8	Jul 20 2020 12:17 AM	43		male		86		1.83		Türkiye
9	Jul 19 2020 11:33 PM	52		male		87		168		TÜRKİYE
10	Jun 22 2020 07:52 AM	41		male		80		173		Turkiye
11	Jun 21 2020 03:13 PM	55		male		91		180		Türkiye
12	Jun 21 2020 11:45 AM	1959		male		71		1.75		Türkiye
13	Jun 21 2020 09:32 AM	62		male		79		174		türkiye
14	Jun 20 2020 04:39 PM	37		male		74		178		Türkiye
15	Jun 20 2020 04:11 PM	37		male		95		182		Türkiye
16	Jun 20 2020 04:06 PM	45		male		98		174		Türkiye
17	Jun 20 2020 03:54 PM	38		male		110		184		Türkiye
18	Jun 20 2020 03:08 PM	45		male		72		173		Tr
19	Jun 20 2020 02:42 PM	42		male		68		170		Türkiye
20	Jun 20 2020 02:16 PM	34		male		79		173		Türkiye
21	Jun 18 2020 06:31 PM	54		male		99		187		Mozambik
22	Jun 17 2020 11:08 PM	42		male		76		175		Türkiye
23	Jun 17 2020 10:59 AM	56		male		54		165		TR
24	Jun 16 2020 11:43 AM	55		male		72		182		TC
25	Jun 16 2020 08:48 AM	59		male		72		170cm		Türkiye
26	Jun 15 2020 09:00 PM	46		male		72		170		Türkiye
27	Jun 15 2020 08:59 PM	33		male		87		183		Türkiye
28	Jun 15 2020 08:11 PM	49		male		81		175		Turkıye
29	Jun 15 2020 07:22 PM	48		male		94		176		Türkiye
30	Jun 15 2020 12:46 PM	38		male		80		181		T.C.
31	Jun 15 2020 12:10 PM	38		male		78		180		Turkiye
32	Jun 15 2020 10:00 AM	39		male		109		182		Turkiye
33	Jun 14 2020 08:00 PM	32		male		102		188		Türkiye
34	Jun 14 2020 05:51 PM	39		male		95		177		Türkiye
35	Jun 14 2020 05:40 PM	37		male		85		172		Türkiye
36	Jun 14 2020 04:56 PM	54		male		75		165		Türkiye
37	Jun 14 2020 04:23 PM	37		male		85		183		Turkey
38	Jun 14 2020 03:21 PM	41		male		80		170		Turkiye
39	Jun 14 2020 03:07 PM	29		male		93		173		Türkiye
40	Jun 14 2020 02:48 PM	43		male		90		170		Türkiye
41	Jun 14 2020 02:46 PM	38		male		74		170		Türkiye
42	Jun 13 2020 08:19 PM	42		male		83		169		Turkey
43	Jun 13 2020 08:10 PM	44		male		74		184		Türkiye
44	Jun 13 2020 07:07 PM	44		male		70		165		Tr
45	Jun 13 2020 06:29 PM	45		male		75		167		Türkiye
46	Jun 13 2020 06:23 PM	49		male		78		172		Türkiye
47	Jun 11 2020 09:04 PM	40		male		98		178		Türkiye
48	Jun 11 2020 08:52 PM	50		male		120		190		Türkiye
49	Jun 11 2020 11:46 AM	51		male		89		179		Türkiye
50	Jun 11 2020 02:32 AM	46		male		74		172		Türkiye
51	Jun 10 2020 02:01 PM	40		male		98		181		Türkiye
52	Jun 10 2020 12:49 PM	44		male		100		183		t.c
53	Jun 10 2020 11:38 AM	38		male		87		178		Türkiye
54	Jun 10 2020 11:37 AM	33		male		80		172		Turkiye
55	Jun 10 2020 11:36 AM	48		male		92		170		Türkiye
56	Jun 10 2020 11:36 AM	37		male		68		173		Türkiye
57	Jun 10 2020 10:16 AM	33		male		82		183		Türkiye
58	Jun 09 2020 11:24 PM	42		male		101		180		Türkiye
59	Jun 09 2020 06:01 PM	43		male		95		183		Türkiye
60	Jun 09 2020 03:03 PM	40		male		76		172		Türkiye
61	Jun 09 2020 02:51 PM	1973		male		82		169		Turkiye
62	Jun 09 2020 01:53 PM	38		male		77		168		Türkiye
63	Jun 07 2020 09:49 PM	41		male		82		172		Türkiye
64	Jun 07 2020 08:56 PM	39		male		72		181		Türkiye
65	Jun 07 2020 08:26 PM	30		male		75		185		Türkiye
66	Jun 07 2020 05:05 PM	56		male		85		177		Türkiye
67	Jun 07 2020 11:56 AM	57		male		85		170		türkiye
68	Jun 06 2020 11:54 PM	58		male		77		169		TC
69	Jun 06 2020 10:26 PM	65		male		70		168		Türkiye
70	Jun 06 2020 07:47 PM	41		male		80		174		Türkiye
71	Jun 06 2020 07:38 PM	50		male		95		180		T.c.
72	Jun 06 2020 07:29 PM	35		male		83		177		Türkiye
73	Jun 06 2020 03:57 PM	39		male		92		184		Türkiye
74	Jun 06 2020 03:52 PM	43		male		80		180		Türkiye
75	Jun 06 2020 03:50 PM	42		male		84		178		Türkiye
76	Jun 06 2020 03:50 PM	33		male		86		177		Türkiye
77	Jun 06 2020 03:49 PM	48		male		83		1.80		Tc
78	Jun 06 2020 03:40 PM	40		male		79		180		Türkiye
79	Jun 06 2020 03:28 PM	56		male		92		185		Türkiye
80	Jun 06 2020 03:08 PM	44		male		85		186		Türkiye
81	Jun 06 2020 03:05 PM	47		male		80		178		Türkiye
82	Jun 03 2020 06:31 PM	36		male		92		183		Turkey
83	Jun 03 2020 06:18 PM	1991		male		67		174		Türkiye
84	Jun 03 2020 05:01 PM	34		male		80		176		Türkiye
85	Jun 03 2020 04:52 PM	30		male		80		178		türkiye
86	Jun 03 2020 04:46 PM	32		male		62		164		Türkiye
87	Jun 03 2020 03:53 PM	53		male		82		182		Türkiye
88	Jun 03 2020 03:51 PM	65		male		72		175 cm.		TC
89	Jun 01 2020 10:06 AM	59		male		92		180		Türkiye
90	May 31 2020 09:34 PM	55		male		75		175		Türkiye
91	May 31 2020 09:07 PM	39		male		85		170		Türkiye
92	May 31 2020 08:44 PM	45		male		82		181		Türkiye
93	May 31 2020 07:17 PM	38		male		88		185		türkiye
94	May 31 2020 06:40 PM	37		male		91		185		Türkiye
95	May 31 2020 06:31 PM	46		male		81		180		Türkiye
96	May 31 2020 05:25 PM	60		male		80		170		Türkiye
97	May 31 2020 05:04 PM	46		male		90		180		Turkiye
98	May 31 2020 04:34 PM	35		male		75		1.72		Turkiye
99	May 31 2020 03:25 PM	37		male		92		178		Türkiye
100	May 31 2020 03:02 PM	46		male		67		168		Türkiye
101	May 31 2020 02:55 PM	60		male		68,5		170		Turkoye
102	May 31 2020 02:14 PM	57		male		75		170		Türkiye
103	May 31 2020 02:11 PM	63		male		81		165		TÜRKİYE
104	May 31 2020 01:51 PM	53		male		79		178		Tr
105	May 31 2020 01:23 PM	36		male		88		176		Türkiye
106	May 31 2020 01:10 PM	36		male		80		170		Türkiye
107	May 31 2020 01:03 PM	62		male		80		1,72		Türkiye
