# Supplementary material for: Physical and mental effects of different radical prostatectomy techniques on urologic surgeons
Source: PeerJ journal article supplement (doi:10.7717/peerj.19908), 2025-08-20
Supplement: SURVEY_QUESTIONS.pdf [file SURVEY_QUESTIONS.pdf]

## ERGONOMIC EVALUATION OF RADICAL PROSTATECTOMY TECHNIQUES

**A total of 10 questions are in the survey.**

**The estimated time to complete the survey is approximately 5 minutes.**

\* 1. How many radical prostatectomy surgeries do you perform a year? (Please check all that apply)

Open

Laparoscopic

Robotic

\* 2. Before the radical prostatectomy, Do your patients and/or their family (relatives) cause stress on you?

☐

Always

☐

Rarely

☐

Usually

☐

Never

☐

Sometimes

\* 3. How often do expectations of your employer about radical prostatectomy cause stress on you?

☐

Always

☐

Rarely

☐

Usually

☐

Never

☐

Sometimes

\* 4. During a radical prostatectomy, which of the following(s) cause(s) stress on you? (Please check all that apply)

☐

None

☐

Frequent change of the surgical team

☐

Patient with morbid obesity

☐

Complications during or after the surgery

☐

Grade or stage of the disease

☐

Lack of standard postoperative care

☐

Prior history of abdominal

☐

Postoperative follow-up

operation

☐

Other (please specify)

\* 5. How much does/do the preferred technique(s) exhaust you physically? (Please check all that apply)

Severity score (0 - 10)

Open

Laparoscopic

Robotic

6. Which of these complaints do you experience during or after performing radical prostatectomy with the preferred technique(s)? (Please specify the severity of your complaints between "1 and 10". **(If you do not experience any complaint, skip this question. Please check all that apply)**

Open

Lap

Robotic

Forehead pain

Eye strain

Neck pain

Back pain

Shoulder stiffness

Chest pain

Arm pain

Forearm pain

Elbow stiffness

Hand pain

Wrist stiffness

Finger numbness

Leg pain

Other (please specify the preferred technique, your complaints, and the severity between 1 and 10)

7. Have you received any professional support for the complaints that you have experienced? **(If you do not experience any complaint, skip this question. Please check all that apply)**

- ☐ No
- ☐ Lifestyle modifications
- ☐ Physical therapy modalities (Massage, TENS, dry needling, hot-cold compress, stretching)
- ☐ Medical treatment(s)
- ☐ Surgery
- ☐ Other (please specify)

8. Do/Does your complaint(s) affect your choice of radical prostatectomy technique? **(If you do not experience any complaint, skip this question.)**

- ☐ Always
- ☐ Usually
- ☐ Sometimes
- ☐ Rarely
- ☐ Never
- ☐ I can perform only one type of technique.

9. Please only choose the exercise and/or physical activities which you **regularly** do (If none is regular, skip this question. Please check all that apply)

|               | times/week           |
|---------------|----------------------|
| Walking       | <input type="text"/> |
| Running       | <input type="text"/> |
| Bicycling     | <input type="text"/> |
| Swimming      | <input type="text"/> |
| Football      | <input type="text"/> |
| Basketball    | <input type="text"/> |
| Volleyball    | <input type="text"/> |
| Tennis        | <input type="text"/> |
| Golf          | <input type="text"/> |
| Weightlifting | <input type="text"/> |
| Boxing        | <input type="text"/> |
| Meditation    | <input type="text"/> |
| Yoga          | <input type="text"/> |
| Pilates       | <input type="text"/> |

Other (please specify your sports activity or exercise type with its frequency within a week)

\* 10. Please specify your age, gender, weight, height, and country

|              |                      |
|--------------|----------------------|
| Age (year):  | <input type="text"/> |
| Gender:      | <input type="text"/> |
| Weight (kg): | <input type="text"/> |
| Height (cm): | <input type="text"/> |
| Country:     | <input type="text"/> |
